# Supplementary material for: Label-free photoacoustic microscopy for in-vivo tendon imaging using a fiber-based pulse laser
Source: PubMed Central journal article supplement (PMC5859263; doi:10.1038/s41598-018-23113-y), 2018-03-19
Supplement: 41598_2018_23113_MOESM3_ESM.pdf [file 41598_2018_23113_MOESM3_ESM.pdf]

## Label-free photoacoustic microscopy for *in-vivo* tendon imaging using fiber-based pulse laser

Hwi Don Lee<sup>1</sup>, Jun Geun Shin<sup>2</sup>, Hoon Hyun<sup>2</sup>, Bong-Ahn Yu<sup>1\*</sup>, Tae Joong Eom<sup>1\*</sup>

<sup>1</sup>Department of Medical System Engineering, Gwangju Institute of Science and Technology, 123 Cheomdan-gwagi-ro, Buk-gu, Gwangju 61005, South Korea

<sup>2</sup>Electrical Engineering, California Institute of Technology, 1200 E California Boulevard, Pasadena, California, 91125, USA

<sup>3</sup>Gwangju Institute of Science and Technology, Advanced Photonics Research Institute, 123 Cheomdan-gwagi-ro, Buk-gu, Gwangju 61005, South Korea

\*Correspondence and requests for materials should be addressed to B.-A.Y. ([bayu@gist.ac.kr](mailto:bayu@gist.ac.kr)) or T.J.E. ([eomtj@gist.ac.kr](mailto:eomtj@gist.ac.kr)).

### Supplementary Figures

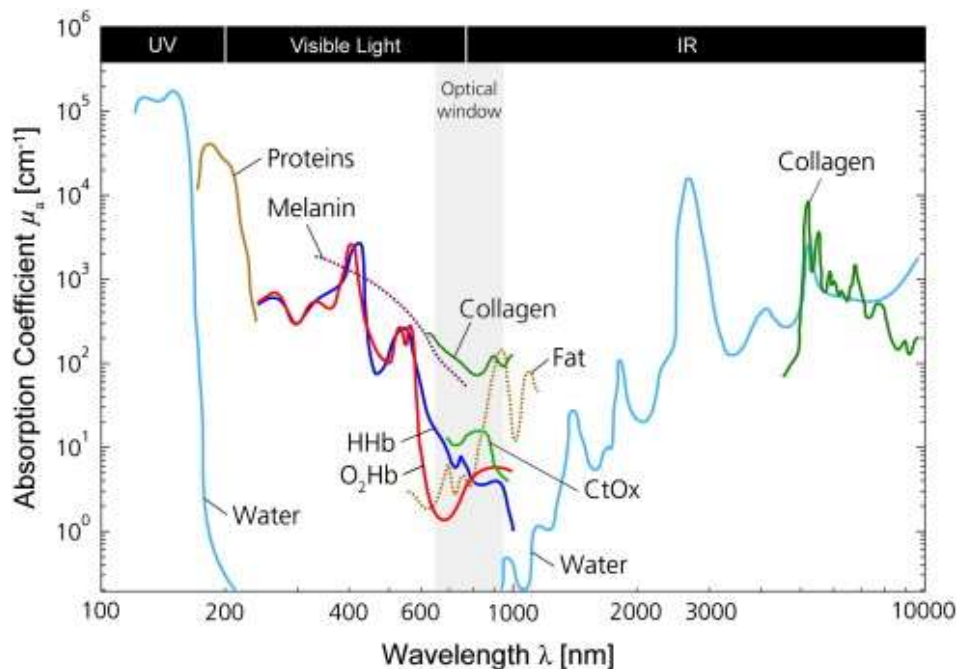

**Supplementary Figure S1 | Absorption spectra (natural logarithm base!) for different chromophores present in human tissue. Shown are the spectra for O<sub>2</sub>Hb, HHb, proteins, water, collagen, fat and cytochrome oxidase (CtO<sub>x</sub>) in the region from 100 nm to 10,000 nm. The spectra are given with respect to the specific concentration in mM. (Reference 34)**

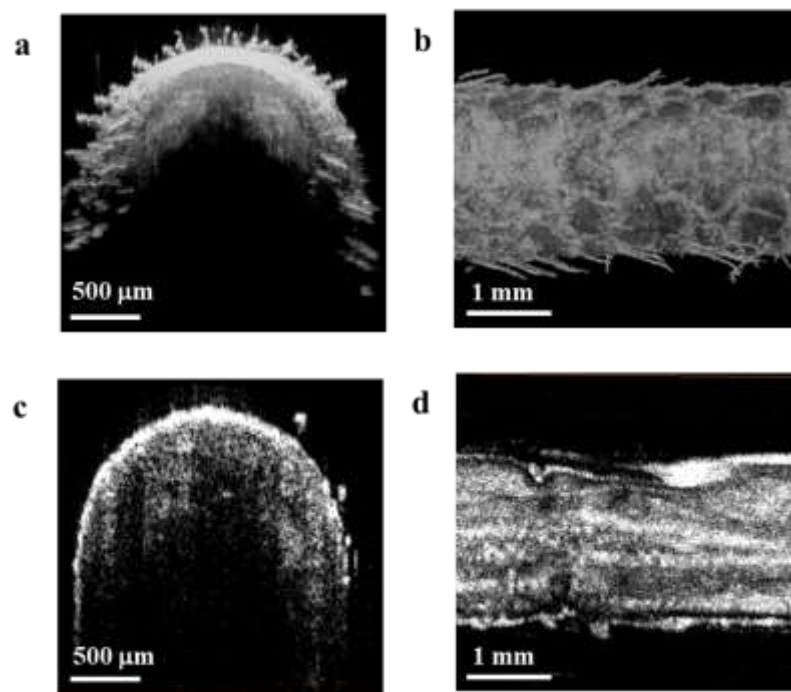

**Supplementary Figure S2 | three-dimensional optical coherence tomography image of mouse tail (a) *in-vivo* depth-resolved (b) *en face* (c) *ex-vivo* depth-resolved (d) *en-face***

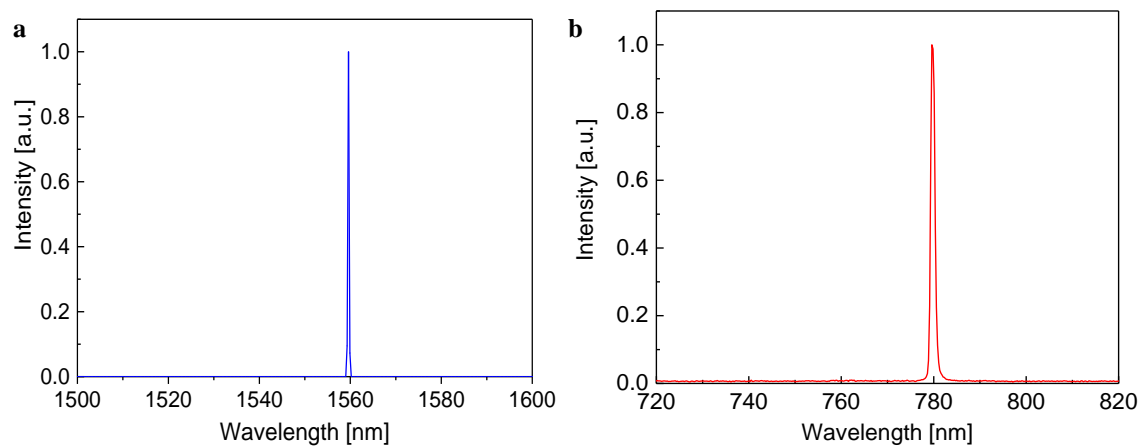

**Supplementary Figure S3 | (a) Optical spectrum of output pulse with maximum peak power of 450 kW at PRR of 25 kHz (b) Optical spectrum of output pulse after second harmonic generation**

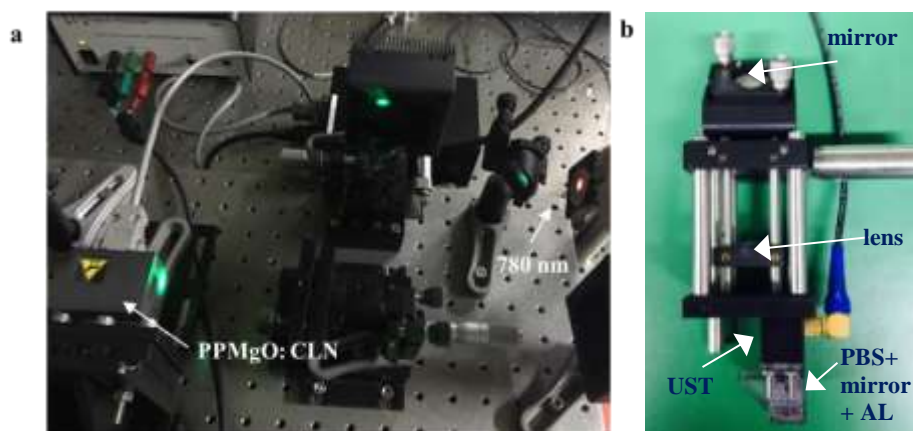

Supplementary Figure S4 | Photography of (a) second harmonic generation module and (b) sample arm. UST: ultrasound transducer ; PBS : polarization beam splitter; AL: acoustic lens ; red arrow : adjusting range of lens

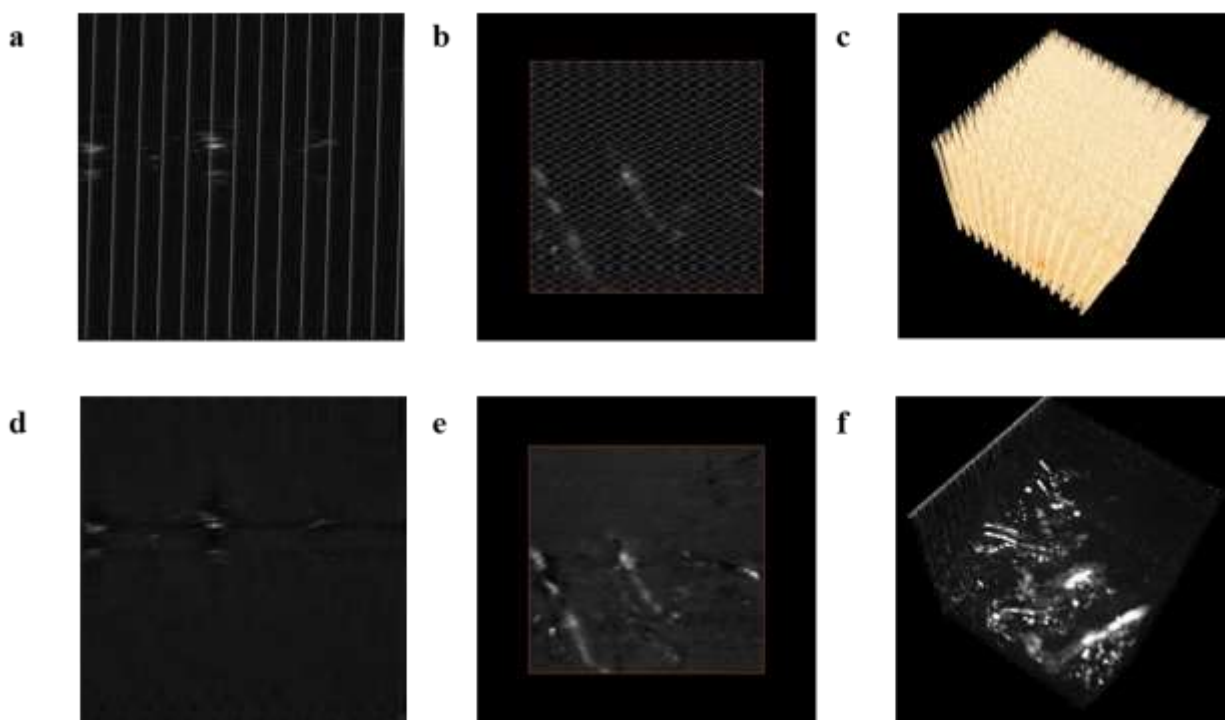

Supplementary Figure S5 | PAM images before quasi-periodic noise removing (a) depth-resolved (b) enface (c) 3D rendering. PAM images after quasi-periodic noise removing (d) depth-resolved (e) enface (f) 3D rendering.

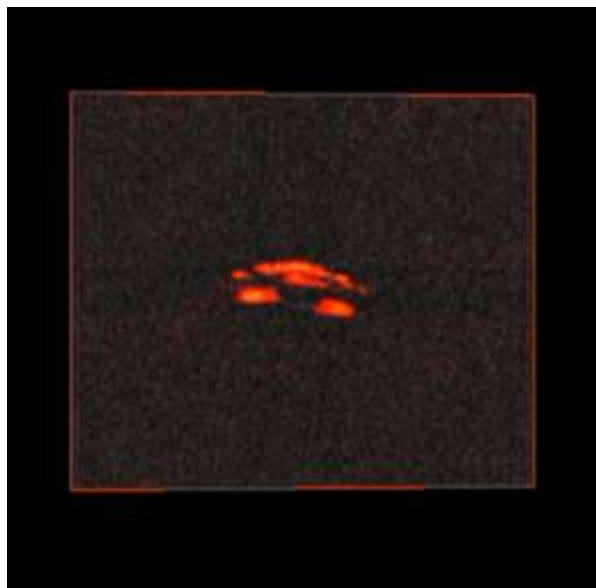

**Supplementary Video S1 | *In-vivo* three-dimensional tendon imaging movie of the mouse tail. The movie is processed by commercial software, Arima.**

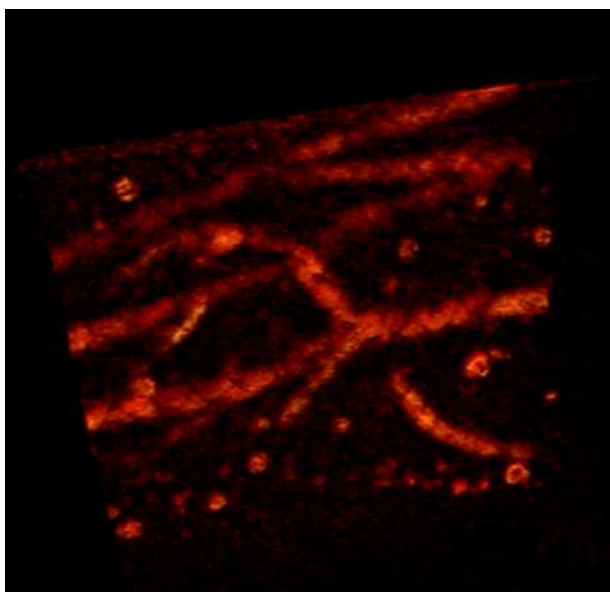

**Supplementary Video S2 | *In-vivo* three-dimensional tendon imaging movie of the mouse paw. The movie is processed by commercial software, Arima.**
